# Supplementary material for: A simple pyridine-based highly specific fluorescent probe for tracing hypochlorous acid in lysosomes of living cells
Source: Royal Society of Chemistry journal article supplement (doi:10.1039/d1nj02256c), 2021-01-01
Supplement: d1nj02256c1.pdf [file d1nj02256c1.pdf]

## Supporting Information

### **A simple pyridine-based highly specific fluorescent probe for tracing hypochlorous acid in lysosomes of living cells**

Kun Wang <sup>a</sup>, Yilin Liu <sup>a</sup>, Caiyun Liu <sup>a\*</sup>, Hanchuang Zhu <sup>a</sup>, Xiwei Li <sup>a</sup>, Fenfen Zhang <sup>a</sup>, Na Gao <sup>a</sup>, Xiangming Pang <sup>c</sup>, Wenlong Sheng <sup>c</sup> and Baocun Zhu <sup>a,b\*</sup>

<sup>a</sup> School of Water Conservancy and Environment, University of Jinan, Jinan 250022, China.

<sup>b</sup> Key Laboratory of Molecular and Nano Probes, Ministry of Education, Shandong Normal University, Jinan 250014, China.

<sup>c</sup> Biology Institute, Qilu University of Technology (Shandong Academy of Sciences), Jinan 250103, China.

\*Corresponding author. *E-mail address*: liucaiyun1982072@163.com (C. Liu), lcyzbc@163.com (B. Zhu)

## Table of Contents

1. Materials and instruments
2. Determination of the detection limit
3. Synthesis of compound **2**
4. Spectral experiments of probe **Lyso-PHE**
5. UV-vis absorption spectra
6. Cytotoxicity assays
7. Cell culture conditions
8. Preparation of reactive oxygen species (ROS) and reactive nitrogen species (RNS)
9. Characterization data of probe **Lyso-PHE**
10. Recognition mechanism of probe **Lyso-PHE** for HOCl
11. Additional table of comparison between reported HOCl probes and **Lyso-PHE**

## 1. Materials and instruments

Unless otherwise stated, chemical reagents were purchased from commercial vendor and were used as received. Absorption spectra were carried out using a UV-3101PC spectrophotometer. Fluorescence emission spectra were performed using a Horiba FluoroMax-4 spectrophotometer. The slit width was 5.0 nm for both excitation and emission. High resolution mass spectra (HRMS) were carried out using a LC-MS2010A instrument. Fluorescence imaging of HOCl in live cells was carried out on an Olympus FV1000-IX81 confocal fluorescence microscope.

## 2. Determination of the detection limit

The detection limit was calculated based on the fluorescence titration. The limit of detection (LOD) was calculated as follows:

$$\text{LOD} = 3\sigma/k,$$
$$\sigma = \sqrt{\frac{\sum (\bar{x} - x_i)^2}{n - 1}}$$

where  $\sigma$  is the standard deviation of the blank solution,  $\bar{x}$  is the mean of the blank measures,  $x_i$  is the value of blank measures,  $n$  is the number of tested blank measures ( $n = 5$ ), and  $k$  is the slope between the fluorescence intensities versus the concentrations of HOCl.

## 3. Synthesis of compound 2

4-Chloro-1,8-naphthalic anhydride (2.32 g, 10 mmol) and 4-Aminopyridine (1.41 g, 15 mmol) were dissolved in ethanol (50 mL) and stirred under reflux for 10 h.

After cooling to room temperature, the light pink crude product (1.95 g) is obtained by vacuum filtration. This product was not further purification.

#### 4. Spectral experiments of probe Lyso-PHE

In the pH-dependent experiment, the PBS buffer solutions with different pH in the range of 3 to 9 were prepared. Subsequently, the response of probe **Lyso-PHE** (5  $\mu\text{M}$ ) to HOCl (5  $\mu\text{M}$ ) was tested in PBS solution (10 mM) with different pH (3-9). The excitation wavelength is 468 nm and the fluorescence intensity at 560 nm was recorded.

In the time-dependent fluorescence experiment, we first prepared a probe solution with probe **Lyso-PHE** concentration of 5  $\mu\text{M}$ , and then the spectral data of the solution were collected at 560 nm. When 5  $\mu\text{M}$  HOCl was added at 50 s, a significant fluorescence enhancement was observed, and then the spectral data were recorded and saved.

In the fluorescence titration experiment, the probe solution with probe **Lyso-PHE** concentration of 5  $\mu\text{M}$  was prepared and divided into several groups. According to a certain concentration gradient, HOCl (0-5  $\mu\text{M}$ ) was added to the solution. When the reaction between HOCl and probe **Lyso-PHE** was complete, we recorded and saved all spectral data.

In the selective experiment, we first prepared a series of analyte solutions, such as  $\text{K}^+$ ,  $\text{Ca}^{2+}$ ,  $\text{Na}^+$ ,  $\text{Mg}^{2+}$ ,  $\text{Zn}^{2+}$ ,  $\text{Fe}^{3+}$ ,  $\text{Fe}^{2+}$ ,  $\text{Cu}^{2+}$ ,  $\text{NO}_3^-$ ,  $\text{NO}_2^-$ ,  $\text{I}^-$ ,  $\text{CO}_3^{2-}$ ,  $\text{Mn}^{2+}$ ,  $\text{Br}^-$ ,  $\text{SO}_4^{2-}$ ,  $\text{Cl}^-$ , cysteine (Cys), homocysteine (Hcy), glutathione (GSH),  $\text{S}^{2-}$ , hydroxyl radical ( $\cdot\text{OH}$ ), *tert*-butoxy radical ( $\cdot\text{O}^t\text{Bu}$ ), NO,  $^1\text{O}_2$ , *tert*-butylhydroperoxide (TBHP),  $\text{O}_2^-$ ,

H<sub>2</sub>O<sub>2</sub>, ONOO<sup>-</sup>, HOCl. Then we prepared a probe solution with probe **Lyso-PHE** concentration of 5 μM, and the solution was divided into several groups. The above analytes were added to the probe solution. After that we collect the spectral data at 560 nm.

## 5. UV-vis absorption spectra

In the UV-vis absorption spectra, we prepared a probe solution with probe **Lyso-PHE** concentration of 20 μM, and the solution was divided into two groups: A and B. A as the control group, after adding 30 μM HOCl to B, we collected the absorption spectra of A and B.

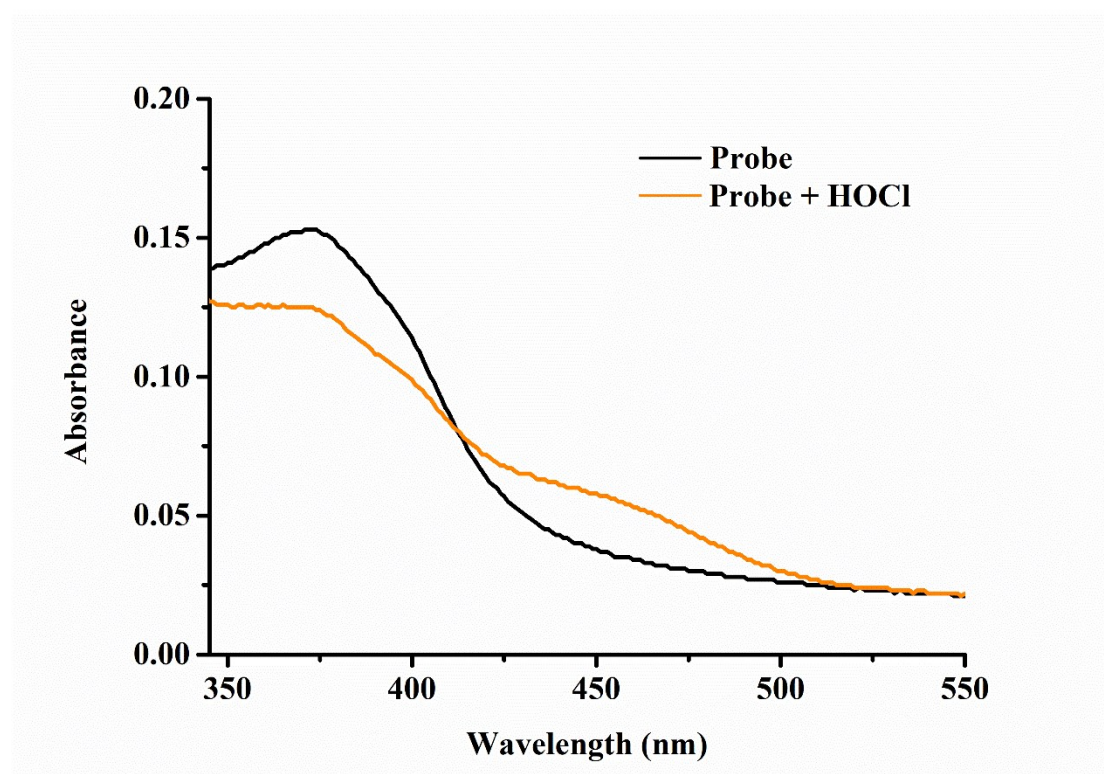

**Figure S1.** Absorption responses of probe **Lyso-PHE** (20 μM) in the presence of HOCl (30 μM) in PBS solution (10 mM, pH = 5.0) at 25 °C.

## 6. Cytotoxicity assays

The cell viability of HeLa cells, treated with probe **Lyso-PHE**, was assessed by a cell counting kit-8 (CCK-8; Dojindo Molecular Technologies, Tokyo, Japan). Briefly, HeLa, seeded at a density of  $1 \times 10^6$  cells·mL<sup>-1</sup> on a 96-well plate, were maintained at 37 °C in a 5% CO<sub>2</sub> / 95% air incubator for 12 h. Then, the live HeLa cells were incubated with various concentrations (0, 5, 10, 20 and 30 μM) of probe **Lyso-PHE** suspended in culture medium for 10 h. Subsequently, CCK-8 solution was added into each well for 2 h, and absorbance at 450 nm was measured.

## **7. Cell culture conditions**

The HeLa cells were cultured in Dulbecco's modified Eagle's medium (DMEM) and incubated under an atmosphere containing 5% CO<sub>2</sub> at 37 °C humidified air for 24 h. DMEM contains 10% fetal bovine serum and 1% penicillin-streptomycin.

## **8. Preparation of reactive oxygen species (ROS) and reactive nitrogen species (RNS)**

### **TBHP**

*tert*-butylhydroperoxide (TBHP) were diluted from the commercially available solution to 0.1 M in ultrapure water.

### **•OH**

Hydroxyl radical (•OH) was generated by Fenton reactions. To prepare •OH solution, hydrogen peroxide (H<sub>2</sub>O<sub>2</sub>, 2 eq) was added to FeSO<sub>4</sub> in deionised water.

### **•O<sup>t</sup>Bu**

*tert*-butoxy radical (•O<sup>t</sup>Bu) was generated by Fenton reactions.

### **O<sub>2</sub><sup>-</sup>**

Superoxide (O<sub>2</sub><sup>-</sup>) was generated from KO<sub>2</sub> in DMSO.

## **<sup>1</sup>O<sub>2</sub>**

Singlet oxygen (<sup>1</sup>O<sub>2</sub>) was generated from HOCl and H<sub>2</sub>O<sub>2</sub>.

## **NO**

Nitric oxide (NO) was generated from potassium nitroprusside dihydrate.

## **H<sub>2</sub>O<sub>2</sub>**

The concentration of hydrogen peroxide (H<sub>2</sub>O<sub>2</sub>) was determined from the absorption at 240 nm ( $\epsilon = 43.6 \text{ M}^{-1} \text{ cm}^{-1}$ ).

## **NaOCl**

The concentration of sodium hypochlorite (NaOCl) was determined from the absorbance at 292 nm ( $\epsilon = 350 \text{ M}^{-1} \text{ cm}^{-1}$ ).

## **ONOO<sup>-</sup>**

Simultaneously, 0.6 M KNO<sub>2</sub>, 0.6 M HCl and 0.7 M H<sub>2</sub>O<sub>2</sub> was added to a 3 M NaOH solution at 0 °C. The concentration of peroxynitrite was estimated by using the extinction co-efficient of 1670 cm<sup>-1</sup> M<sup>-1</sup> at 302 nm in 0.1 M sodium hydroxide aqueous solutions.

## **9. Characterization data of probe Lyso-PHE**

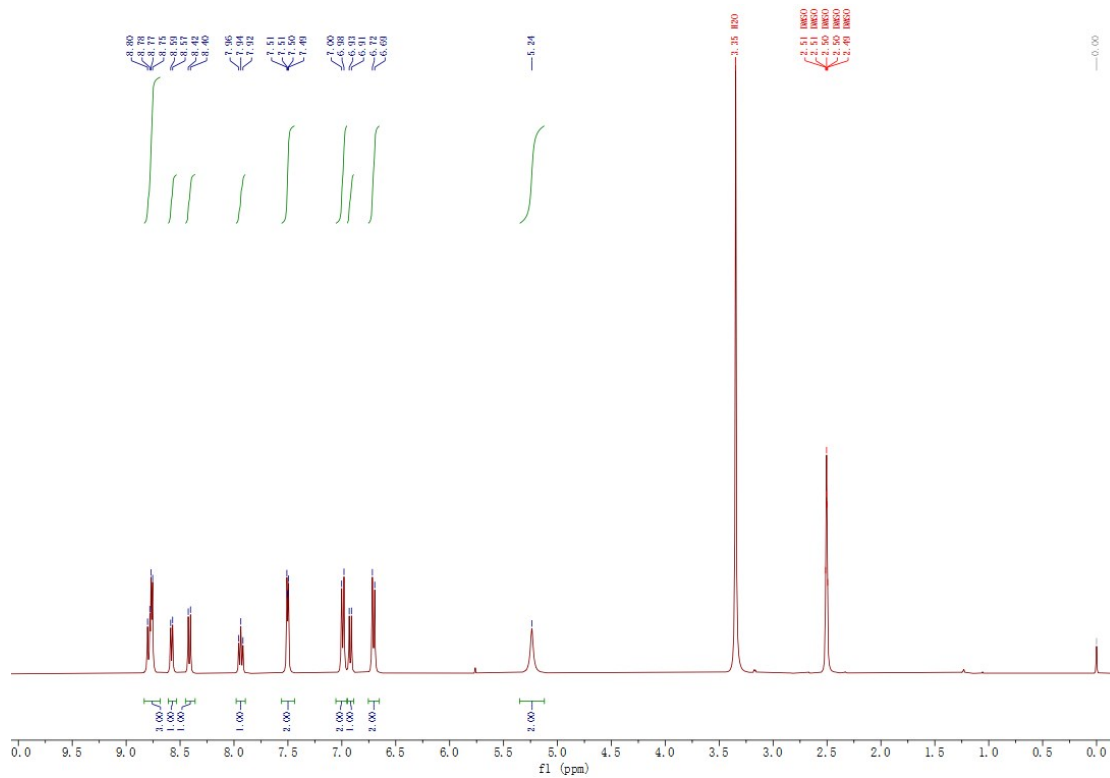

**Figure S1.**  $^1\text{H}$ -NMR data of probe Lyso-PHE.

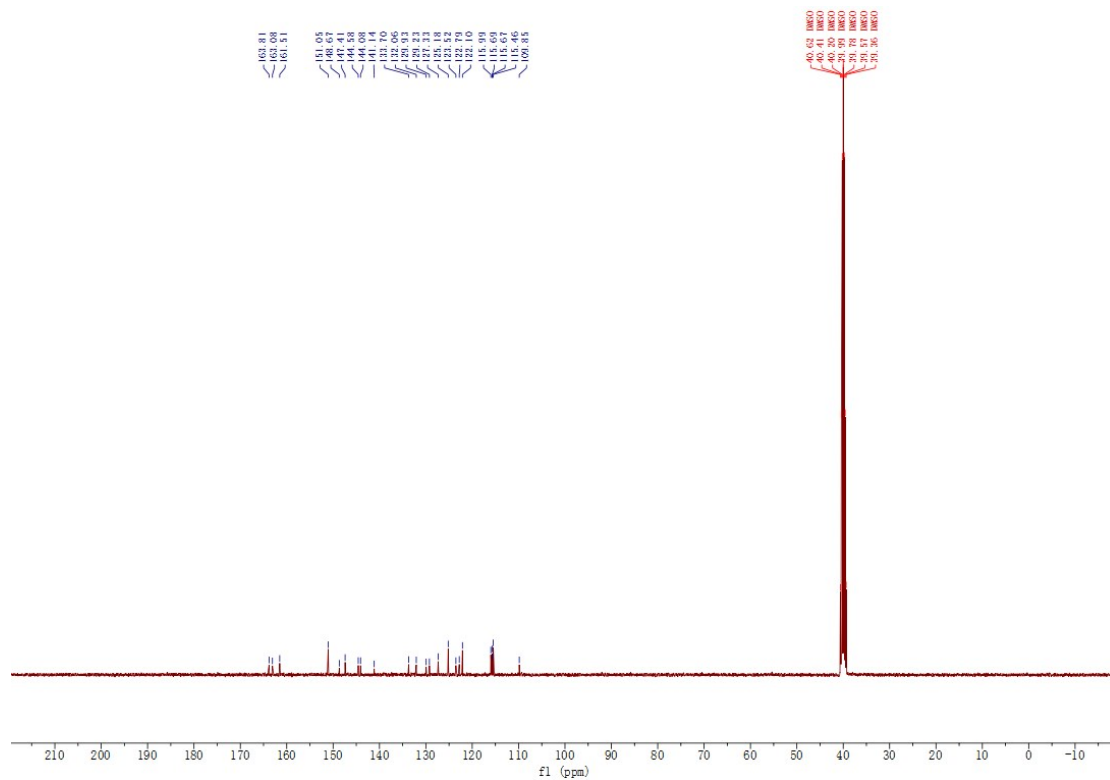

**Figure S2.**  $^{13}\text{C}$ -NMR data of probe Lyso-PHE.



## 10. Recognition mechanism of probe Lyso-PHE for HOCl

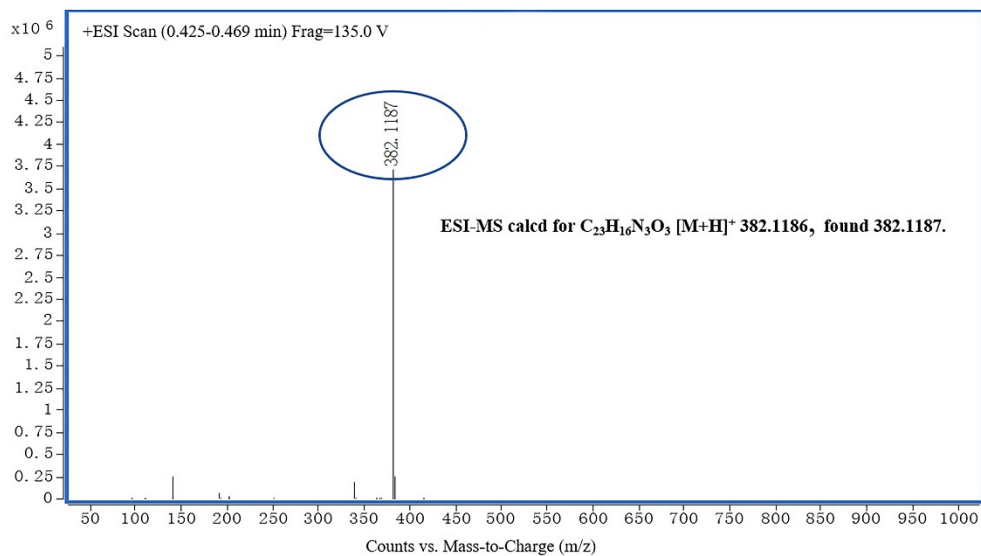

**Figure S3.** HRMS data of probe **Lyso-PHE**.

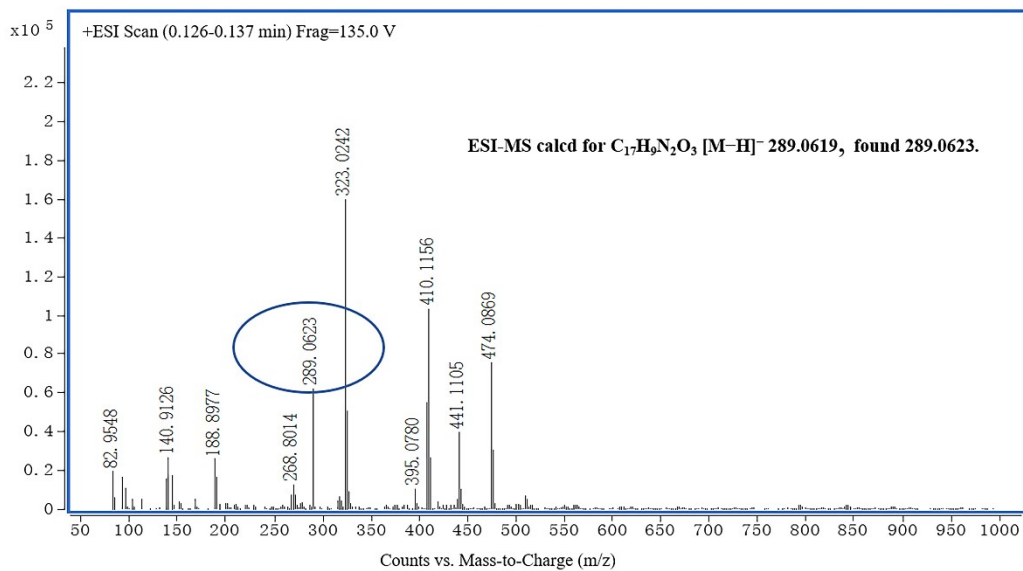

**Figure S4.** HRMS data of the reaction products of probe **Lyso-PHE** with HOCl.

## 11. Additional table of comparison between reported HOCl probes and Lyso-PHE

**Table S1.** Comparison of fluorescent probes for HOCl

| Probe                                                                               | Solution         | Detection limit | Response time  | Co-localization Imaging                    | References                                                  |
|-------------------------------------------------------------------------------------|------------------|-----------------|----------------|--------------------------------------------|-------------------------------------------------------------|
| 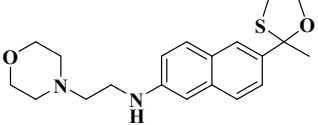   | PBS/EtOH, 1:1    | 16.6 nM         | Within seconds | HeLa and RAW 264.7 cells                   | <i>J. Am. Chem. Soc.</i> , 2015, <b>137</b> , 11654-11657.  |
|    | aqueous solution | 674 nM          | 2.5 min        | 4T1 cells (Overlap Coefficient: 0.89)      | <i>Anal. Chem.</i> , 2017, <b>89</b> , 10348-10390.         |
|   | PBS/EtOH, 7:3    | 27 nM           | ~0.2 s         | RAW264.7 cells (Overlap Coefficient: 0.99) | <i>Sens. Actuators B Chem.</i> , 2018 <b>263</b> , 252-257. |
|   | PBS/DMF, 8:2     | 73 nM           | ~18 s          | HeLa cells (Overlap Coefficient: 0.86)     | <i>Anal. Chem.</i> , 2019, <b>91</b> , 2932-2938            |
|  | 0.5 % DMSO       | 53 nM           | within 5 s     | -                                          | <i>Chem. Commun.</i> , 2020, <b>56</b> , 2598-2601          |

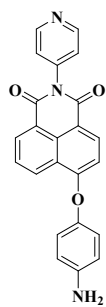

aqueous solution

16 nM

< 5 s

HeLa, HepG2 and RAW  
264.7 cells (Overlap  
Coefficient: 0.96, 0.95  
and 0.92)

This work

---
